# Supplementary material for: A low-cost particulate matter (PM 2.5 ) monitor for wildland fire smoke
Source: Copernicus journal article supplement (doi:10.5194/amt-11-1087-2018), 2018-02-23
Supplement: Supplementary file [file amt-11-1087-2018-supplement-title-page.pdf › amt-11-1087-2018-supplement-title-page.pdf]

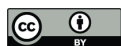

## *Supplement of*

# **A low-cost particulate matter (PM<sub>2.5</sub>) monitor for wildland fire smoke**

**Scott Kelleher et al.**

*Correspondence to:* John Volckens ([john.volckens@colostate.edu](mailto:john.volckens@colostate.edu))

- [amt-11-1087-2018-supplement-title-page.pdf](#)
- [OAS\\_lab\\_validation.csv](#)
- [OAS\\_precision\\_outdoors.csv](#)
- [Pargin\\_data\\_revised.csv](#)
- [Supplement.pdf](#)

The copyright of individual parts of the supplement might differ from the CC BY 4.0 License.
